# Supplementary material for: Evaluating the Quality of TikTok Videos on Sudden Cardiac Death Using Multiple Scales: A Cross-Sectional Analysis of Correlations with Video Characteristics and High-Quality Health Information
Source: Research Square preprint supplement (doi:10.21203/rs.3.rs-7746991/v1), 2025-11-13
Supplement: Supplementary file 1 [file 2c86d38c2f0ee90219643c7f.docx]

**e-table 1: Adapted JAMA Benchmark Criteria for Evaluating Healthcare Video Content with 0–4 Scoring Interpretation**

| **Domain** | **Item** | **Points** | | | | |
| --- | --- | --- | --- | --- | --- | --- |
| **Low reliability** | | **Moderate reliability** | | **High reliability** |
| **0** | **1** | **2** | **3** | **4** |
| **Authorship** | **Is the video created by a credible source (e.g.- recognized health institution- medical university- or board-certified professional)?** | No authorship information provided | Minimal or unclear author information | Partial credentials or affiliation provided | Most credentials/affiliations provided but incomplete | Full authorship, credentials, and affiliations clearly stated |
| **Attribution** | **Does the video reference recent studies- data- or treatment protocols?** | No references or sources cited | Very limited or unclear sources | Some sources cited but incomplete | Most sources cited, minor omissions | All sources clearly cited and verifiable |
| **Currency** | **Is the content up to date- reflecting the latest research- clinical guidelines- and medical practices?** | No indication of date or update | Date present but outdated | Partially up-to-date content | Mostly current with minor gaps | Fully current, reflecting latest evidence and guidelines |
| **Disclosure** | **Does the video avoid commercial- promotional- or entertainment-driven motives?** | No disclosure, clear promotional content | Minimal disclosure, mostly promotional | Partial disclosure, minor promotional elements | Most disclosures present, minimal bias | Full disclosure, content is unbiased and free of promotional influence |

**e-table 2: Modified CRAAP Criteria for Evaluating Healthcare Video Content with 0–4 Scoring Interpretation**

| **Domain** | **Questions** | **Points** | | | | |
| --- | --- | --- | --- | --- | --- | --- |
| **0** | **1** | **2** | **3** | **4** |
| **Source** | **Is the organization or individual behind the video well-known and respected in the field of health or medicine?** | Not credible or unknown | Limited credibility | Partially credible | Mostly credible | Highly credible and recognized |
|  | **Can you verify the source's credentials or affiliations?** | Not provided | Partially unclear | Some verification possible | Mostly verifiable | Fully verifiable and transparent |
| **Relevance** | **Does this video give useful and reliable health information that fits my research topic and audience?** | Not relevant | Minimally relevant | Somewhat relevant | Mostly relevant | Highly relevant |
| **Authority** | **Does the creator have relevant qualifications or expertise in the topic covered in the video?** | None | Minimal | Partial/unclear | Mostly qualified | Fully qualified and expert |
|  | **Is the creator a recognized expert or a board-certified professional in the relevant field (e.g.- medicine- nursing- public health)?** | No | Unclear | Partially | Mostly | Yes, fully recognized |
|  | **Is the creator's experience or background clearly presented in the video?** | Not presented | Minimal | Partially presented | Mostly clear | Fully clear and detailed |
| **Accuracy** | **Is the information presented in the video factually correct and based on current medical evidence?** | Incorrect | Mostly incorrect | Partially correct | Mostly correct | Fully accurate |
|  | **Are any claims supported by well-established scientific or clinical guidelines?** | None | Minimal | Some | Mostly | Fully supported |
|  | **Does the video avoid misleading or inaccurate information?** | Misleading | Mostly misleading | Partially accurate | Mostly accurate | Fully accurate and reliable |
| **Currency** | **Has the information been updated to account for any recent changes in guidelines or clinical recommendations?** | Outdated | Mostly outdated | Partially updated | Mostly current | Fully current and updated |
| **Purpose** | **Is the primary purpose of the video to inform or educate the viewer?** | Entirely promotional | Mostly promotional | Partially informative | Mostly informative | Fully educational |
|  | **Is the content presented in an unbiased and objective manner- without an underlying agenda or marketing focus?** | Biased | Mostly biased | Some bias | Mostly objective | Fully objective and unbiased |
